# Supplementary material for: Raman spectroscopy as a quick tool to assess purity of extracellular vesicle preparations and predict their functionality
Source: PubMed Central journal article supplement — J Extracell Vesicles. 2019 Jan 27;8(1):1568780. doi: 10.1080/20013078.2019.1568780 (PMC6352930; doi:10.1080/20013078.2019.1568780), 2019-01-27
Supplement: ZJEV_A_1568780_SM4855.pdf [file ZJEV_A_1568780_SM4855.pdf]

## Supplementary Material

### **Raman spectroscopy as a quick tool to assess purity of extracellular vesicle preparations and predict their functionality**

Alice Gualerzi<sup>1§\*</sup>, Sander Alexander Antonius Kooijmans<sup>2§</sup>, Stefania Niada<sup>3</sup>, Silvia Picciolini<sup>1,4</sup>, Anna Teresa Brini<sup>3,5</sup>, Giovanni Camussi<sup>6</sup> and Marzia Bedoni<sup>1</sup>

<sup>1</sup> *IRCCS Fondazione Don Carlo Gnocchi, Milano, Italy*

<sup>2</sup> *Bioindustry Park Silvano Fumero SpA, Colletterto Giacosa, Italy*

<sup>3</sup> *IRCCS Istituto Ortopedico Galeazzi*

<sup>4</sup> *Nanomedicine Center NANOMIB, University of Milano-Bicocca, Monza, Italy*

<sup>5</sup> *Dipartimento di Scienze Biomediche, Chirurgiche ed Odontoiatriche, Università degli Studi di Milano, Milano, Italy*

<sup>6</sup> *Department of Medical Sciences, Molecular Biotechnology Center, University of Turin, Italy*

§ These authors contributed equally to this study

\*corresponding author: Phone: +39 02 403085633. Email: [agualerzi@dongnocchi.it](mailto:agualerzi@dongnocchi.it)

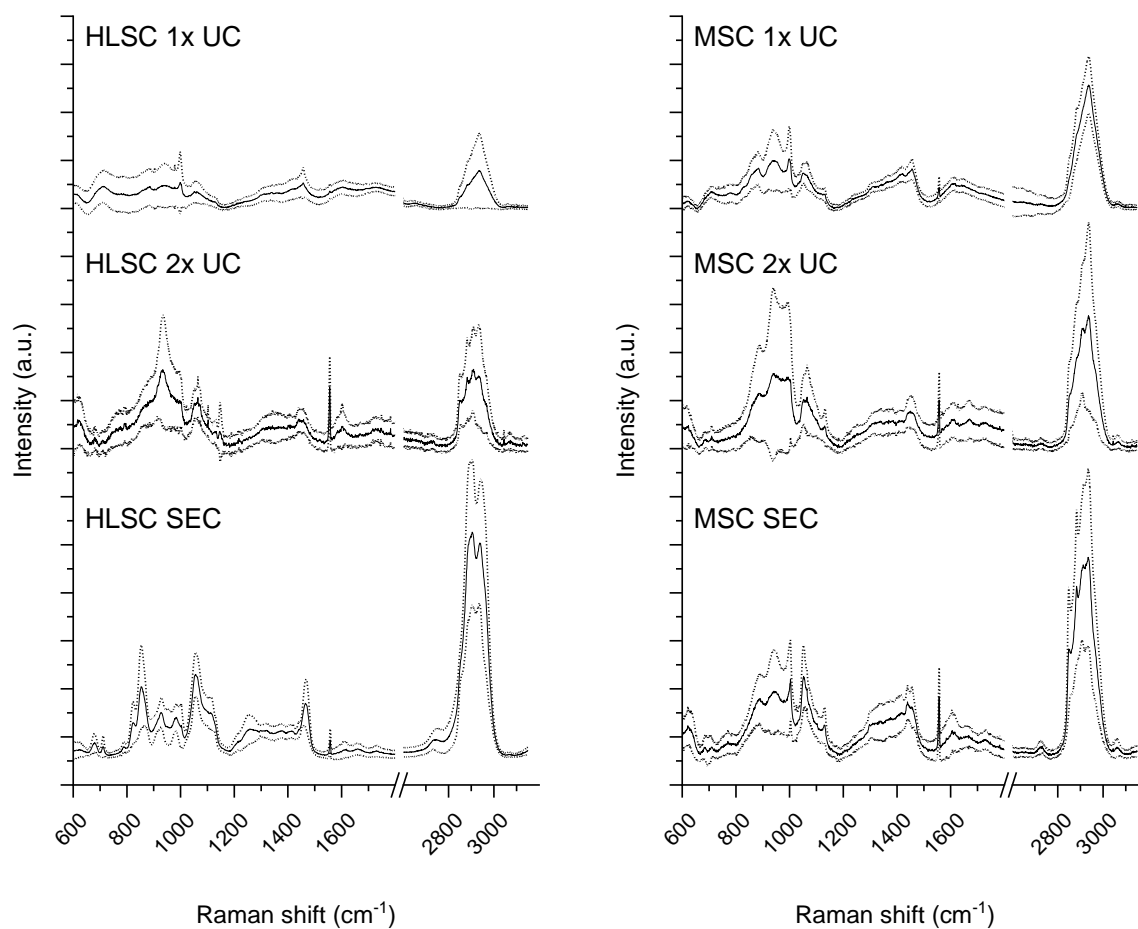

**Supplementary Figure 1. Raman spectra of EV samples.** Mean Raman spectra obtained on air dried drop of EV samples isolated by 1x UC, 2x UC and SEC protocols from HLSC and MSC supernatants. All spectra were baseline corrected, aligned and normalized before averaging. Dotted lines indicate standard deviation of the signal intensities (at least 60 spectra per sample).

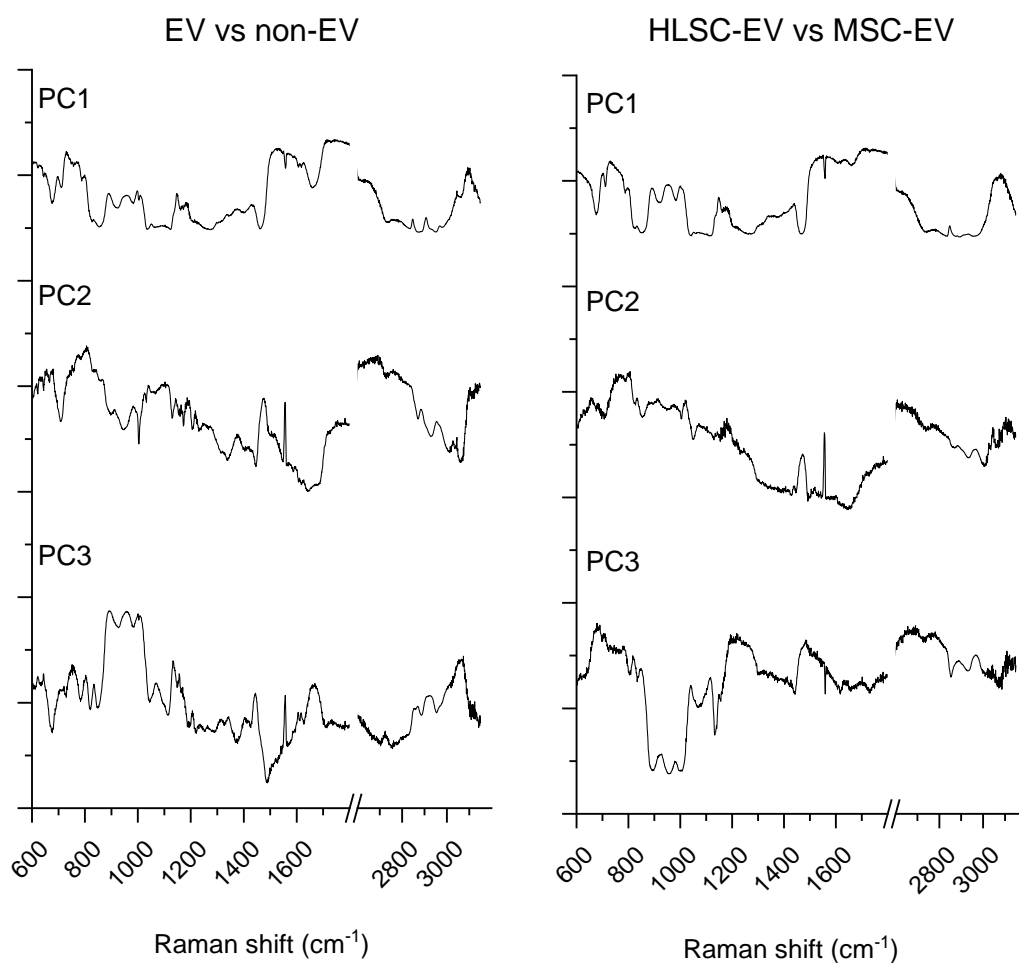

**Supplementary Figure 2. Principal Component Analysis (PCA).** Loadings of the Principal Component (PC) obtained after multivariate PCA. Left panel: PC1, PC2 and PC3 obtained after PCA analysis of the EV and non-EV Raman spectra non considering the cell source for the analysis, describing the 34.8%, 13.97% and 9.6% of total variance. Right panel: PC1, PC2 and PC3 obtained after PCA analysis of the EV Raman spectra from HLSC and MSC by 1x UC, 2x UC and SEC protocols, describing the 37.1%, 13.4% and 9% of total variance.

| cm <sup>-1</sup> | HLSC-EV |       |       | MSC-EV |       |       | Origin                                                                       |
|------------------|---------|-------|-------|--------|-------|-------|------------------------------------------------------------------------------|
|                  | SEC     | 2x UC | 1x UC | SEC    | 2x UC | 1x UC |                                                                              |
| 679              | x       | x     |       | x      | x     | x     | <i>Nucleic acids</i>                                                         |
| 710-713          | x       | x     | x     | x      | x     | x     | <i>Phospholipids</i>                                                         |
| 788              | x       | x     |       | x      |       |       | <i>O-P-O stretching in nucleic acids</i>                                     |
| 825              |         |       |       | x      |       |       | <i>Phosphodiester</i>                                                        |
| 855              |         |       |       | x      |       |       | <i>Pro, Tyr</i>                                                              |
| 928-940          | x       | x     |       | x      | x     | x     | <i>Proteins (Pro; Hydroxy-Pro)</i>                                           |
| 1003             | x       | x     | x     | x      | x     | x     | <i>Phe</i>                                                                   |
| 1053-1055        | x       | x     | x     | x      | x     | x     | <i>C-O and C-N stretching in proteins and lipids</i>                         |
| 1065             | x       | x     |       | x      | x     |       | <i>Chain C-C stretching in lipids</i>                                        |
| 1127-1130        | x       | x     |       | x      | x     | x     | <i>C-N stretching of proteins and phospholipids</i>                          |
| 1200-1300        | x       | x     | x     | x      | x     | x     | <i>Amide III</i>                                                             |
| 1450             | x       | x     | x     | x      | x     | x     | <i>CH<sub>2</sub> and CH<sub>3</sub> deformations in proteins and lipids</i> |
| 1455-1457        | x       | x     | x     | x      | x     | x     | <i>Nucleic acids</i>                                                         |
| 1465             |         |       |       | x      |       |       | <i>Lipids</i>                                                                |
| 1556.6           | x       | x     | x     | x      | x     | x     | <i>Background spectrum: substrate impurity</i>                               |
| 1606             | x       | x     | x     | x      | x     | x     | <i>Phe, Tyr ring vibrations</i>                                              |
| 1615             | x       |       |       | x      | x     | x     | <i>Tyrosine, tryptophan, C=C (protein)</i>                                   |
| 1600-1690        | x       | x     | x     | x      | x     | x     | <i>Amide I</i>                                                               |
| 1728             | x       | x     | x     | x      | x     |       | <i>Ester C=O stretches (lipids)</i>                                          |
| 2883             | x       | x     | x     | x      | x     | x     | <i>CH<sub>2</sub> asymmetric stretch in lipids and proteins</i>              |
| 2908             | x       | x     |       | x      | x     |       | <i>CH<sub>3</sub> stretching vibrations</i>                                  |
| 2937-2940        | x       | x     | x     | x      | x     | x     | <i>C-H vibrations in lipids and proteins</i>                                 |

**Supplementary Table 1. Main peak assignments.** The assignments of the main peaks that can be identified in the Raman spectra from EV samples are reported (Czamara K. et al., *Journal of Raman Spectroscopy* (2015); Krafft C. et al., *Spectrochimica Acta Part* (2005); Movasaghi Z. et al., *Applied Spectroscopy Reviews* (2007))
